# Supplementary material
Source: PubMed Central journal article supplement (PMC130018)
Supplement: 1471-2458-2-24-S4.pdf [file 1471-2458-2-24-S4.pdf]

## **Additional file 4: Classification of first in lifetime strokes by pathological type in 129 investigated strokes\***

| Pathological type                 | N   | Percent |
|-----------------------------------|-----|---------|
| Ischaemic                         | 83  | 64      |
| Primary intracerebral haemorrhage | 35  | 27      |
| Sub-arachnoid haemorrhage         | 11  | 9       |
| Total                             | 129 |         |

\* with diagnostic CT scan, lumbar puncture or autopsy
